# Supplementary material
Source: Springer Nature journal article supplement (https://www.springermedizin.de/resource/supplementary/13058_2009_2521_MOESM6_ESM.pdf/9701598)

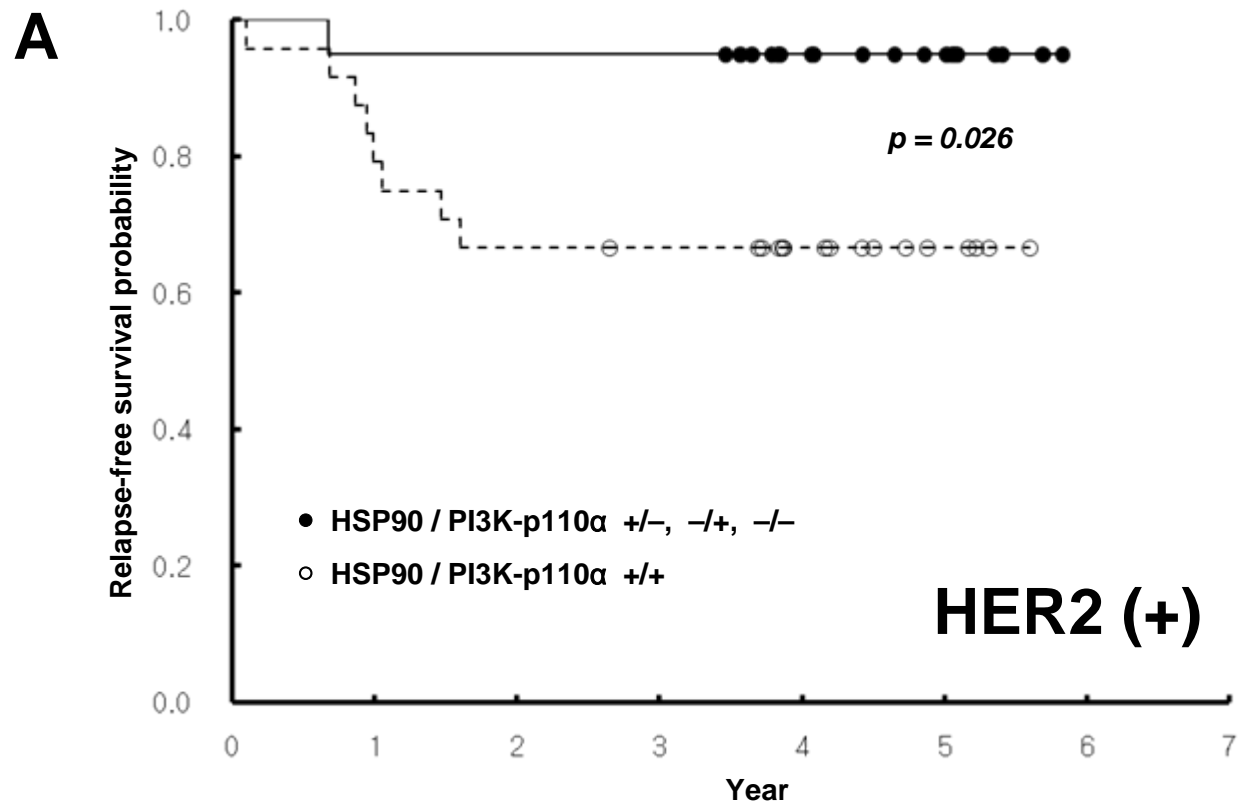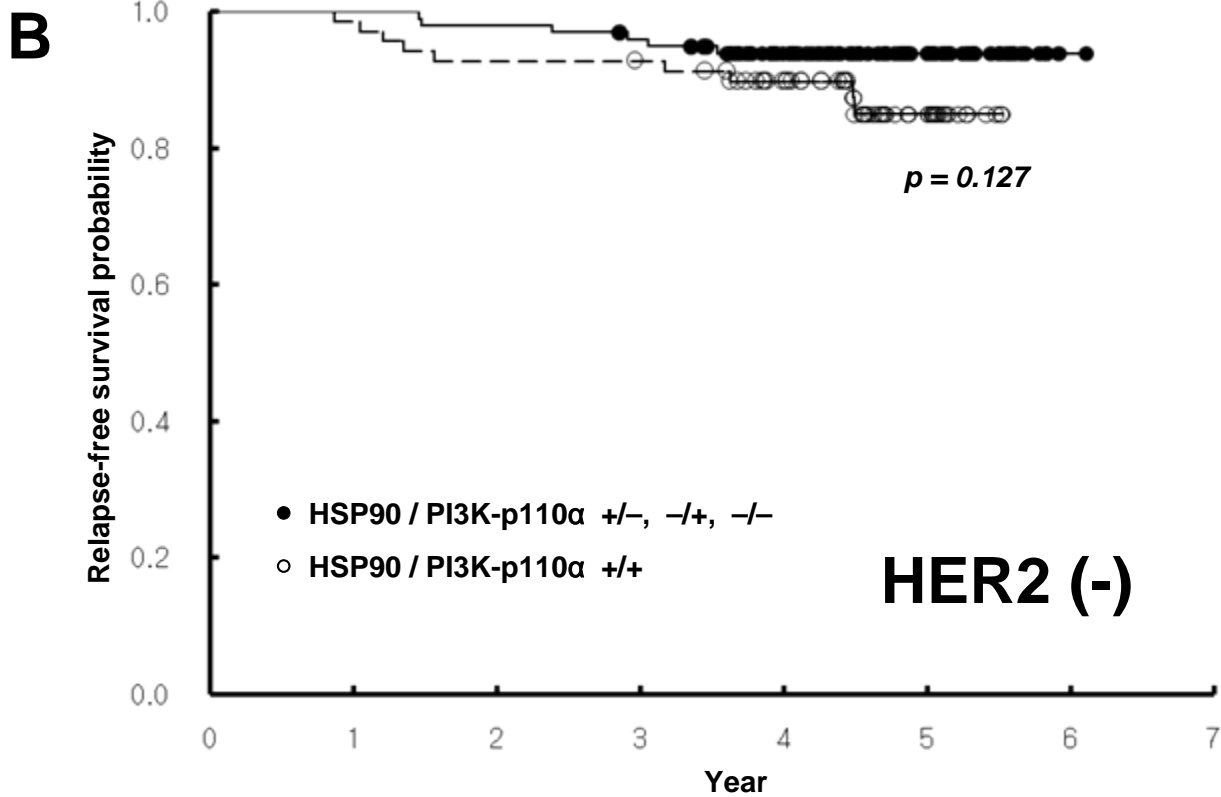

Supplement: MOESM6 [file 9701598]
